# Supplementary material for: Aggregation behavior of zwitterionic surface active ionic liquids with different counterions, cations, and alkyl chains
Source: Royal Society of Chemistry journal article supplement (doi:10.1039/c6ra02986h), 2016-01-01
Supplement: c6ra02986h1.pdf [file c6ra02986h1.pdf]

## SUPPORTING INFORMATION

Table S1. Chemical shifts  $\delta_{\text{obs}}$  (ppm) for various protons of C<sub>12</sub>IPS-Nsa, C<sub>14</sub>IPS-Nsa, C<sub>12</sub>IPS-Bsa, and SB-12-Nsa in D<sub>2</sub>O as a function of concentration

$\delta_{\text{obs}} / \text{C}_{12}\text{IPS-Nsa}$

| C/mM | C-1    | C-2    | C-4    | C-5     | C-6     | C-7    | C-8    |
|------|--------|--------|--------|---------|---------|--------|--------|
| 0.1  | 7.9782 | 8.0063 | 4.1109 | 1.8064  | 1.1708  | 0.7409 | 4.2824 |
| 0.5  | 7.9348 | 7.9732 | 4.0812 | 1.7784  | 1.1666  | 0.7504 | 4.2783 |
| 1.0  | 7.9129 | 7.9661 | 4.0689 | 1.7445  | 1.1572  | 0.7586 | 4.2733 |
| 2.5  | 7.8666 | 7.9534 | 4.0139 | 1.6190  | 1.1449  | 0.7734 | 4.2797 |
| 5.0  | 7.7721 | 7.9111 | 3.9412 | 1.5187  | 1.1001  | 0.7899 | 4.2641 |
| 10.0 | 7.7623 | 7.8492 | 3.9185 | 1.4511  | 1.0529  | 0.8028 | 4.2447 |
| C/mM | C-9    | C-10   | C-11   | C-13,16 | C-14,15 | C-17   |        |
| 0.1  | 2.2604 | 2.8455 | 7.7804 | 7.7504  | 7.4305  | 8.3002 |        |
| 0.5  | 2.2435 | 2.8438 | 7.7755 | 7.7469  | 7.4250  | 8.2973 |        |
| 1.0  | 2.2252 | 2.8365 | 7.7703 | 7.7415  | 7.4145  | 8.2881 |        |
| 2.5  | 2.1840 | 2.8293 | 7.7719 | 7.7430  | 7.3601  | 8.2825 |        |
| 5.0  | 2.1662 | 2.8006 | 7.7721 | 7.7434  | 7.3111  | 8.2649 |        |
| 10.0 | 2.1507 | 2.7928 | 7.7577 | 7.7289  | 7.2726  | 8.2488 |        |

$$\delta_{\text{obs}} / C_{14}\text{IPS-Nsa}$$

| C/mM | C-1    | C-2    | C-4    | C-5    | C-6     | C-7     | C-8    |
|------|--------|--------|--------|--------|---------|---------|--------|
| 0.1  | 7.9614 | 7.9917 | 4.0951 | 1.7537 | 1.2013  | 0.7509  | 4.3196 |
| 0.5  | 7.9560 | 7.9843 | 4.0791 | 1.6838 | 1.1132  | 0.7682  | 4.3153 |
| 1.0  | 7.9360 | 7.9663 | 4.0488 | 1.6435 | 1.0861  | 0.7748  | 4.3106 |
| 2.5  | 9.7931 | 7.9415 | 4.0024 | 1.5802 | 1.0822  | 0.7871  | 4.2973 |
| 5.0  | 7.8860 | 7.9173 | 3.9606 | 1.5296 | 1.0771  | 0.7984  | 4.2814 |
| 10.0 | 7.8485 | 7.8777 | 3.8999 | 1.4518 | 1.0503  | 0.8208  | 4.2603 |
| C/mM | C-9    | C-10   | C-11   | C-12   | C-13,16 | C-14,15 | C-17   |
| 0.1  | 2.2350 | 2.8075 | 8.3065 | 7.7729 | 7.5981  | 7.5692  | 8.3065 |
| 0.5  | 2.2268 | 2.7934 | 8.3005 | 7.7877 | 7.5887  | 7.5322  | 8.3005 |
| 1.0  | 2.2176 | 2.7838 | 8.2925 | 7.7809 | 7.5676  | 7.5304  | 8.2925 |
| 2.5  | 2.2055 | 2.7770 | 8.2830 | 7.7777 | 7.5414  | 7.5093  | 8.2830 |
| 5.0  | 2.1934 | 2.7717 | 8.2709 | 7.7766 | 7.5108  | 5.4915  | 8.2709 |
| 10.0 | 2.1804 | 2.7699 | 8.2553 | 7.7697 | 7.4672  | 7.4359  | 8.2553 |

$$\delta_{\text{obs}} / C_{12}\text{IPS-Bsa}$$

| C/mM | C-7    | C-6     | C-5        | C-9    | C-10   | C-4    | C-8    | C-1    |
|------|--------|---------|------------|--------|--------|--------|--------|--------|
| 0.5  | 0.7607 | 1.1696  | 1.7844     | 2.2362 | 2.8196 | 4.1121 | 4.2780 | 7.7358 |
| 0.75 | 0.7639 | 1.1624  | 1.7832     | 1.2445 | 2.8169 | 4.1040 | 4.2777 | 7.7367 |
| 1.0  | 0.7553 | 1.1600  | 1.7712     | 2.2268 | 2.8154 | 4.1143 | 4.2869 | 7.7352 |
| 2.5  | 0.7462 | 2.1580  | 1.7653     | 2.2337 | 2.8043 | 4.1186 | 4.2918 | 7.7417 |
| 5.0  | 0.7385 | 1.1444  | 1.7453     | 2.2341 | 2.7937 | 4.1194 | 4.3210 | 7.7394 |
| 7.5  | 0.7360 | 1.1385  | 1.7293     | 2.2273 | 2.7848 | 4.1148 | 4.3186 | 7.7400 |
| 10   | 0.7299 | 1.1303  | 1.7136     | 2.2255 | 2.7817 | 4.1042 | 4.3187 | 7.7418 |
| C/mM | C-2    | C-15,11 | C-12,13,14 |        |        |        |        |        |
| 0.5  | 7.7169 | 7.5130  | 7.7298     |        |        |        |        |        |
| 0.75 | 7.7178 | 7.5143  | 7.4305     |        |        |        |        |        |
| 1.0  | 7.7166 | 7.5193  | 7.4354     |        |        |        |        |        |
| 2.5  | 7.7229 | 7.5235  | 7.4427     |        |        |        |        |        |
| 5.0  | 7.7201 | 7.5354  | 7.4424     |        |        |        |        |        |
| 7.5  | 7.7206 | 7.5448  | 7.4409     |        |        |        |        |        |
| 10   | 7.7217 | 7.5473  | 7.4384     |        |        |        |        |        |

$\delta_{\text{obs}} / \text{SB-12-Nsa}$

|      |        |         |        |        |        |         |        |
|------|--------|---------|--------|--------|--------|---------|--------|
| C/mM | C-7    | C-6     | C-5    | C-9    | C-10   | C-1     | C-4    |
| 0.5  | 0.7661 | 1.1851  | 1.6647 | 2.1174 | 2.8870 | 2.9918  | 3.2278 |
| 1.0  | 0.7530 | 1.1763  | 1.6663 | 2.1037 | 2.8739 | 2.9787  | 3.2047 |
| 2.5  | 0.7979 | 1.1727  | 1.5801 | 2.0851 | 2.8496 | 2.9566  | 3.1527 |
| 5.0  | 0.8350 | 1.0475  | 1.4823 | 2.0565 | 2.8311 | 2.9337  | 3.0753 |
| 10.0 | 0.8717 | 0.9542  | 1.4049 | 2.0469 | 2.8178 | 2.9018  | 2.9925 |
| C/mM | C-8    | C-14,15 | C-12   | C-11   | C-17   | C-13,16 |        |
| 0.5  | 3.3597 | 7.5938  | 7.9224 | 8.0027 | 8.2951 | 7.7727  |        |
| 1.0  | 3.3464 | 7.5792  | 7.9017 | 7.9890 | 8.2812 | 7.7669  |        |
| 2.5  | 3.3121 | 7.5592  | 7.8878 | 7.9669 | 8.2772 | 7.7574  |        |
| 5.0  | 3.3005 | 7.5377  | 7.8615 | 7.8716 | 8.2693 | 7.7436  |        |
| 10.0 | 3.2697 | 7.4942  | 7.8276 | 7.8479 | 8.2576 | 7.7352  |        |
